# Supplementary material for: KDP Aqueous Solution-in-Oil Microemulsion for Ultra-Precision Chemical-Mechanical Polishing of KDP Crystal
Source: MDPI journal article supplement (doi:10.3390/ma10030271), 2017-03-09
Supplement: s1 [file s1]

# Supplementary Materials: KDP Aqueous Solution-in-Oil Microemulsion for Ultra-Precision Chemical-Mechanical Polishing of KDP Crystal

Hui Dong, Lili Wang, Wei Gao, Xiaoyuan Li, Chao Wang, Fang Ji, Jinlong Pan and Baorui Wang

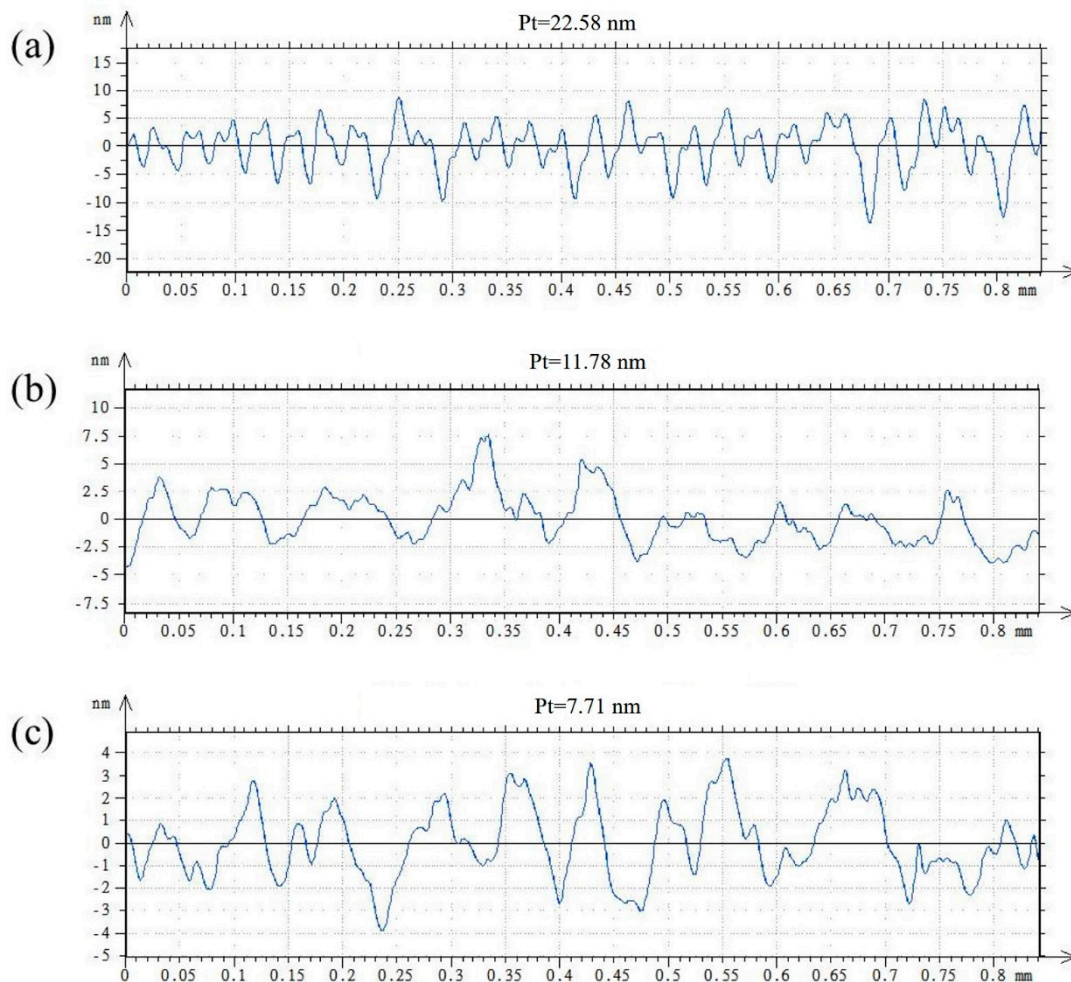

**Figure S1.** Outline of crossing section for different KDP samples: (a) KDP after SPDT; (b) KDP after CMP with traditional W/O microemulsion; and (c) KDP after CMP with functional KDP aq/O microemulsion ( $c_{\text{KDP}}$  was 30 mM).
